# Supplementary material
Source: PubMed Central journal article supplement (PMC4933241)
Supplement: 10.1074_M116.719575_jbc.M116.719575-1.pdf [file 10.1074_M116.719575_jbc.M116.719575-1.pdf]

**Supplemental Information**

**Role of Aromatic Amino Acids in Lipopolysaccharide and Membrane Interactions of Antimicrobial Peptides for use in Plant Disease Control**

Aritreyee Datta<sup>1</sup>, Dipita Bhattacharyya<sup>1</sup>, Shalini Singh<sup>2</sup>, Anirban Ghosh<sup>1</sup>, Artur Schmidtchen<sup>3,4</sup>,  
Martin Malmsten<sup>2,\*</sup>, Anirban Bhunia<sup>1,\*</sup>

<sup>1</sup>Department of Biophysics, Bose Institute, P-1/12 CIT Scheme VII (M), Kolkata 700054, India

<sup>2</sup>Department of Pharmacy, Uppsala University, SE-75232 Uppsala, Sweden

<sup>3</sup>Division of Dermatology and Venereology, Department of Clinical Sciences, Lund University, SE-221 84 Lund, Sweden

<sup>4</sup>Lee Kong Chian School of Medicine, Nanyang Technological University, 11 Mandalay Road, Singapore 308232

Running title: Structural characterization of KYE28 in LPS.

**Table S1.** Medium- and long-range NOEs ( $i, \geq i+5$ ) used to determine the three-dimensional structure of KYE28 in LPS.

| <b>KYE28 in LPS</b>             |                                |
|---------------------------------|--------------------------------|
| <b>Medium Range NOE</b>         | <b>Long Range NOE</b>          |
| Phe23C <sup>α</sup> H-Tyr25HN   | Phe19C <sup>β</sup> Hs-Tyr25H3 |
| His8C <sup>α</sup> H-Leu10HN    | Phe19C <sup>β</sup> Hs-Tyr25H2 |
| Thr5C <sup>α</sup> H-Ile7HN     | Ile7C <sup>γ</sup> H-Tyr25H3   |
| Thr6C <sup>α</sup> H-His8HN     | Leu18C <sup>δ</sup> H-Phe23H2  |
| Tyr2C <sup>α</sup> H-Thr6HN     | Thr6C <sup>γ</sup> H-Tyr25H2   |
| Ile4C <sup>α</sup> H-Ile7HN     | PheC <sup>β</sup> Hs-Phe11H2   |
| Ile4C <sup>α</sup> H-His8HN     | PheC <sup>β</sup> Hs-Phe11H3   |
| Phe23C <sup>α</sup> H-Thr26HN   | Leu27C <sup>β</sup> Hs-Tyr2H3  |
| Asn22C <sup>α</sup> H-Gly24HN   | Leu27C <sup>γ</sup> H-Tyr2H3   |
| Thr15C <sup>γ</sup> H-Phe19H3   | Leu27C <sup>δ</sup> Hs-Tyr2H3  |
| Leu14C <sup>δ</sup> Hs-Arg17HN  | Leu18C <sup>δ</sup> H-Phe23H3  |
| Ile7C <sup>γ</sup> H-Phe11H2    | Thr26C <sup>γ</sup> H-Tyr2H3   |
| Thr15C <sup>γ</sup> H-Phe19H2   | Tyr25C <sup>β</sup> Hs-Tyr2H3  |
| Thr15C <sup>β</sup> H-Phe19H3   | Tyr25C <sup>β</sup> Hs-Tyr2H2  |
| Ile7HN-Asn9HN                   | Leu10C <sup>δ</sup> Hs-Phe19H2 |
| His16 C <sup>α</sup> H-Phe19HN  | Leu10C <sup>δ</sup> Hs-Phe19H3 |
| Ile7C <sup>γ</sup> H-Phe11H2    | Phe11H2-Tyr25H2                |
| Tyr25C <sup>α</sup> H-Phe23H2   | Leu10C <sup>δ</sup> Hs-Phe19H2 |
| Phe19C <sup>α</sup> H-Phe23H2   | Leu10C <sup>δ</sup> Hs-Phe19H3 |
| Phe19C <sup>β</sup> H-Phe23H2   |                                |
| Phe11HN-Asn9HN                  |                                |
| Phe19HN-Arg21HN                 |                                |
| Phe23HN-Arg21HN                 |                                |
| Leu27C <sup>δ</sup> H-Tyr25H2   |                                |
| Leu27 C <sup>γ</sup> H -Tyr25H2 |                                |
| Phe23H2-Phe19H3                 |                                |

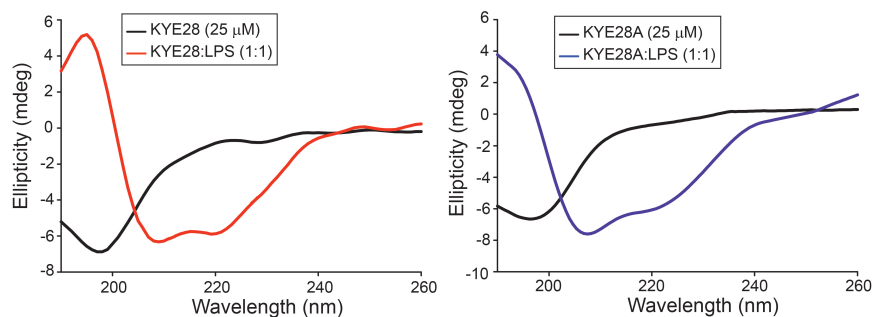

**Figure S1.** CD spectra of KYE28 (left panel) and KYE28A (right panel) in 10mM phosphate buffer of pH 4.5 (NMR experimental condition) and in the presence of LPS at 25°C. In both cases, the peptides have a random coil conformation in aqueous solution but adopted alpha helical conformation in the presence of LPS.

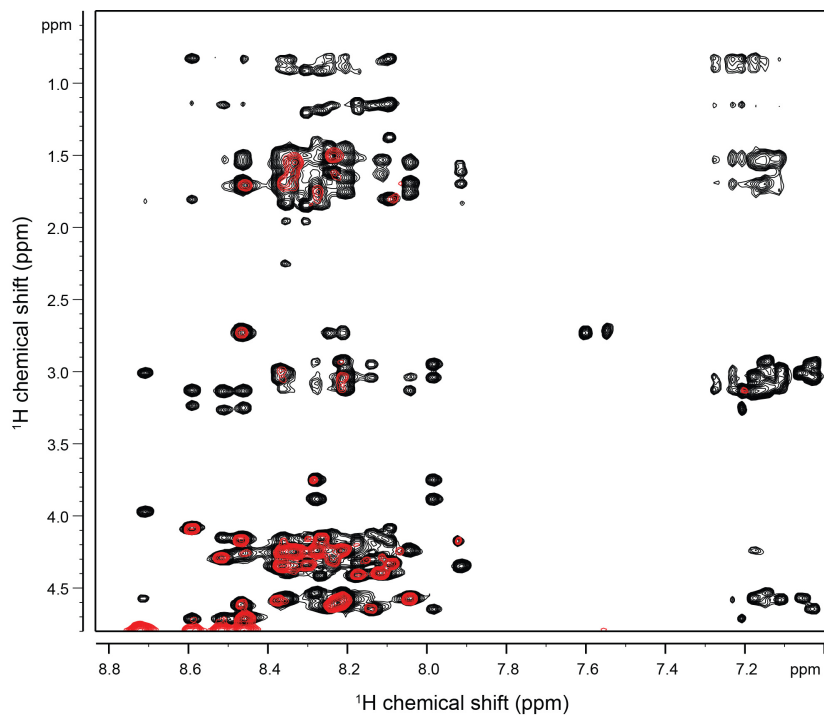

**Figure S2.** Overlay of the NOESY spectra of KYE28 in aqueous solution (red) and in the presence of LPS micelle (black), showing that the peptide remains unstructured in solution as evident from the appearance of only intra-residual and sequential NOEs. All experiments were performed at 25°C using Bruker Avance III 700 MHz spectrometer, equipped with cryoprobe.

## Structural characterization of KYE28 in LPS

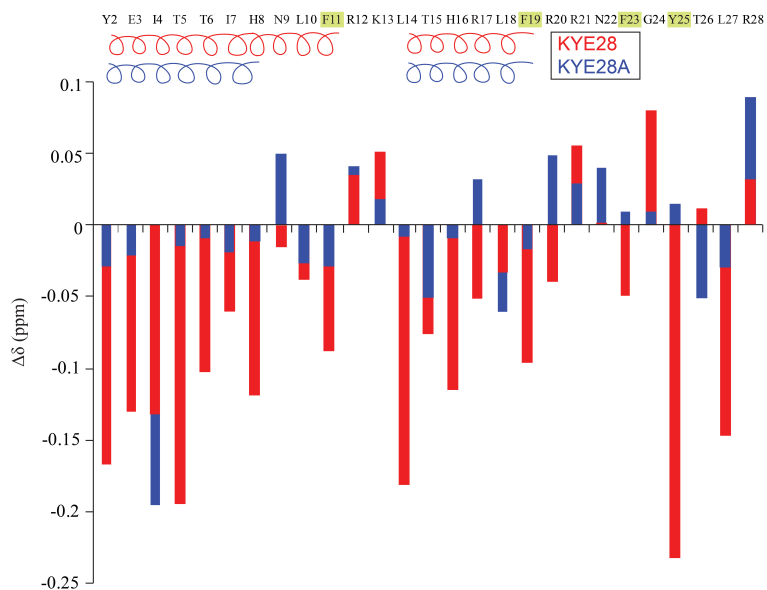

**Figure S3.** Chemical shift deviations ( $\Delta H^\alpha$ ) of the  $C^\alpha H$  proton from the random coil values for the peptides KYE28 (red) and KYE28A (blue) in LPS. The peptide sequence of KYE28 is shown at the top, with the aromatic residues, mutated to alanine in KYE28A, highlighted in green.

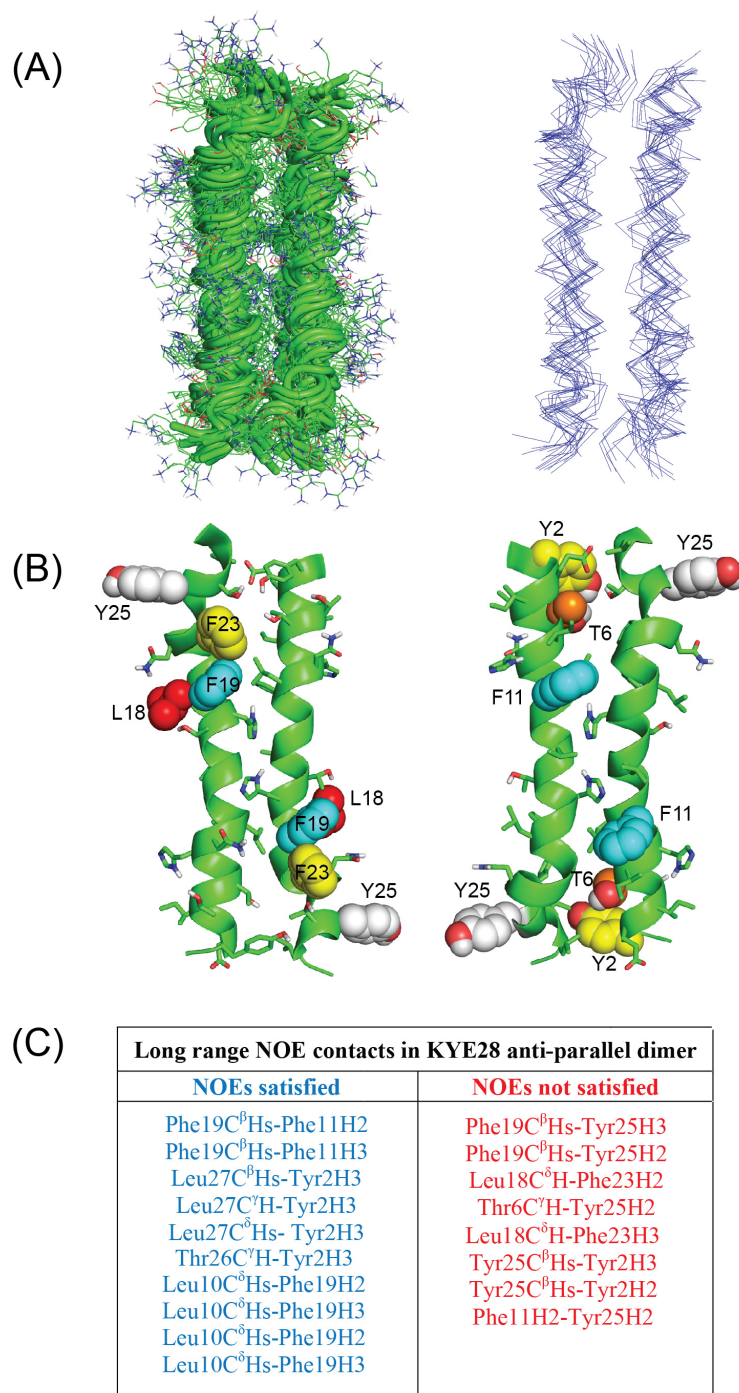

**Figure S4.** Calculated structure of the anti-parallel dimer conformation of KYE28, showing (A) cartoon and line representation of the superimposition of the backbone and side chain atoms of 20 ensemble structures (left panel) and ribbon representation of the backbone superimposition of 20 ensemble structures (right panel). Higher Backbone (N, C<sup>α</sup> and C<sup>γ</sup>) as well as heavy chain RMSD for 20 ensemble structure confirms that the antiparallel dimer is poorly defined. (B) Cartoon and stick representation of single anti-parallel dimer structure of KYE28 where aromatic and hydrophobic residues that share long-range NOE contacts in the trNOESY spectra, but were

not satisfied as either intra-monomeric or intermonomeric NOE contacts in the antiparallel dimer, are highlighted in differently colored spheres. (C) Table showing the important long-range NOEs that were satisfied or not satisfied in the antiparallel dimer conformation marked in blue or red, respectively. As demonstrated, the anti-parallel structure agrees poorly to the experimental results.
